# Supplementary material for: Construction of Genetic Linkage Map and Mapping QTL Specific to Leaf Anthocyanin Colouration in Mapping Population ‘Allahabad Safeda’ × ‘Purple Guava (Local)’ of Guava (Psidium guajava L.)
Source: MDPI journal article supplement (doi:10.3390/plants11152014), 2022-08-02
Supplement: s1 [file s1]

## Article

# Construction of Genetic Linkage Map and Mapping QTL Specific to Leaf Anthocyanin Colouration in Mapping Population ‘Allahabad Safeda’ × ‘Purple Guava (Local)’ of Guava (*Psidium guajava* L.)

Harjot Singh Sohi <sup>1,\*</sup>, MIS Gill <sup>1</sup>, Parveen Chhuneja <sup>2</sup>, N.K. Arora <sup>1</sup>, Sukhjinder Singh Maan <sup>1</sup> and Jagmohan Singh <sup>3</sup>

## Supplementary Materials

**Table S1.** Anthocyanin Reflective Index (*ARI*) of the guava parents and their F1 hybrids at LSD ( $p \leq 0.05$ ).

| Sr. No.                    | Varieties/F1 hybrids of Guava | Anthocyanin Reflective index value ( <i>ARI</i> ) |
|----------------------------|-------------------------------|---------------------------------------------------|
| 1                          | Allahabad Safeda ‘AS’         | 0.053                                             |
| 2                          | Purple Guava (local) ‘PG’     | 0.266                                             |
| 3                          | Seedless ‘SL’                 | 0.013                                             |
| 4                          | CISH G-1                      | 0.172                                             |
| 5                          | ‘AS’ × ‘PG’                   | 0.214                                             |
| 6                          | ‘AS’ × ‘CISH G-1’             | 0.125                                             |
| 7                          | ‘AS’ × ‘SL’                   | 0.027                                             |
| LSD ( $p \leq 0.05$ )=0.02 |                               |                                                   |

**Table S2.** A candidate gene markers *MdMYB*.

| Sr No | Locus            | Repeat motif | Primer sequence (5’ to 3’)                          | Tm           | Reference allelic Size (bp) | Amplification |
|-------|------------------|--------------|-----------------------------------------------------|--------------|-----------------------------|---------------|
| 1     | MdMYB9           | (CT)15       | F: TCCATAACCTTCTTGGAACA<br>R: AAGGAGAATCGGCTTTTCGAT | 52.1<br>54.0 | 606                         | NA            |
| 2     | MdMYB10          | -            | F: CGAGTGCTAATAGCAACC<br>R: CCTCTGTTGGCCGAATACAC    | 50.4<br>55.8 | 1945                        | NA            |
| 3     | MdMYB10 (F1, R1) | -            | F: AATGGCCTACCACATCATTG<br>R: AATGGCCTACCACATCATTG  | 52.9<br>52.9 | 786                         | P             |
| 4     | MdMYB10 (F2, R2) | -            | F: AGGTGCCTGGACTCGAGAGGA<br>R: CGACGACGTTTGTGGTGGCG | 62.0<br>61.7 | 1182                        | NA            |
| 5     | MdMYB17          | (T)14/(AT)10 | F: TGCTCCTCTCTAGCTATTGCA<br>R: AAGACTCACAACTAGCTGTC | 55.5<br>54.7 | 205                         | NA            |

Five anthocyanin apple candidate gene markers referred by Chagne *et al.* (2007) were tested on parent AS, PG and F1 hybrids (H) of cross combination (I). # NA- Non-amplified, P- Polymorphic.

**Table S3.** List of SSR primer pairs used for the construction of linkage map in guava.

| Sr. No. | Locus    | Repeat motif                                          | Primer sequence (5' to 3')                        | Tm           | Reference allelic Size (bp) |
|---------|----------|-------------------------------------------------------|---------------------------------------------------|--------------|-----------------------------|
| 1       | mPgCIR1  | (GA) <sub>17</sub>                                    | F: TAGTGCTTTGGTTGCTT<br>R: GCAGGTGGATATAAGGTC     | 48.8<br>49.3 | 237                         |
| 2       | mPgCIR2  | (GA) <sub>20</sub>                                    | F: AGTGAACGACTGAAGACC<br>R: ATTACACATTCAGCCACTT   | 51.5<br>49.2 | 224                         |
| 3       | mPgCIR3  | (GA) <sub>40</sub>                                    | F: TTGTGGCTTGATTTCC<br>R: TCGTTTAGAGGACATTTCT     | 46.6<br>47.9 | 158                         |
| 4       | mPgCIR4  | (GA) <sub>25</sub>                                    | F: TTCAGGGTCTATGGCTAC<br>R: CAACAAGATACAGCGAACT   | 50.6<br>50.0 | 148                         |
| 5       | mPgCIR5  | GA <sub>31</sub>                                      | F: GCCTTTGAACCACATC<br>R: TCAATACGAGAGGCAATA      | 47.8<br>47.3 | 252                         |
| 6       | mPgCIR7  | (CA) <sub>13</sub> AA(GAA) <sub>3</sub>               | F: ATGGAGGTAGGTTGATG<br>R: CGTAGTAATCGAAGAAATG    | 47.8<br>45.4 | 149                         |
| 7       | mPgCIR8  | (GA) <sub>12</sub>                                    | F: ACTTTCGGTCTCAACAAG<br>R: AGGCTTCCTACAAAAGTG    | 49.5<br>49.3 | 214                         |
| 8       | mPgCIR9  | (GA) <sub>19</sub>                                    | F: GCGTGTCTGATTGTTTC<br>R: ATTTTCTTCTGCCTTGTC     | 48.6<br>47.4 | 173                         |
| 9       | mPgCIR10 | (CT) <sub>12</sub>                                    | F: GTTGGCTCTTATTTTGGT<br>R: GCCCATATCTAGGAAG      | 47.4<br>48.4 | 261                         |
| 10      | mPgCIR11 | (CT) <sub>17</sub>                                    | F: TGAAAGACAACAAACGAG<br>R: TTACACCCACCTAAATAAGA  | 47.5<br>47.9 | 298                         |
| 11      | mPgCIR13 | AC <sub>12</sub> (AT) <sub>4</sub> G(GA) <sub>2</sub> | F: CCTTTTCCCGACCATTACA<br>R: TCGCACTGAGATTTTGTGCT | 52.7<br>54.9 | 245                         |
| 12      | mPgCIR14 | (GA) <sub>11</sub>                                    | F: TAAACACAACAAGGGTCA<br>R: CAGTTTTCATATCGTCCTC   | 48.5<br>49.2 | 185                         |
| 13      | mPgCIR15 | (GA) <sub>8</sub> GG(GA) <sub>9</sub>                 | F: CCGATCATCTCTTTCTTT<br>R: TCTAATCCCCTGAGTTTC    | 47.9<br>46.3 | 147                         |
| 14      | mPgCIR16 | (TC) <sub>25</sub>                                    | F: AATACCAGCAACACCAA<br>R: CATCCGTCTCTAAACCTC     | 48.5<br>49.2 | 292                         |
| 15      | mPgCIR17 | (CT) <sub>23</sub>                                    | F: CCTTTCGTCATATCACTT<br>R: CATTGGATGGTTGACAT     | 47.1<br>46.7 | 231                         |
| 16      | mPgCIR18 | (GA) <sub>23</sub>                                    | F: TAAGCTGCATGTGTGC<br>R: ATGGCTTTGGATGAAA        | 50.0<br>45.2 | 195                         |
| 17      | mPgCIR19 | (CT) <sub>16</sub>                                    | F: AAAATCCTGAAGACGAAC<br>R: TATCAGAGGCTTGCATTA    | 47.1<br>47.6 | 274                         |
| 18      | mPgCIR20 | (CT) <sub>14</sub> (CA) <sub>17</sub>                 | F: TATACCACACGCTGAAAC<br>R: TTCCCCATAAACATCTCT    | 49.4<br>47.2 | 266                         |
| 19      | mPgCIR21 | (AG) <sub>15</sub> GG(AG) <sub>7</sub>                | F: TGCCCTTCTAAGTATAACAG<br>R: AGCTACAAACCTTCCTAAA | 48.8<br>48.2 | 154                         |
| 20      | mPgCIR22 | (GT) <sub>9</sub> (GA) <sub>14</sub>                  | F: CATAAGGACATTTGAGGAA<br>R: AATAAGAAAGCGAGCAGA   | 46.8<br>48.5 | 235                         |
| 21      | mPgCIR23 | (TA) <sub>4</sub> (GT) <sub>7</sub>                   | F: GTCTATACCTAATGCTCTGG<br>R: CCCAGGAAAATCTATCAC  | 49.2<br>47.0 | 185                         |
| 22      | mPgCIR25 | (GA) <sub>24</sub>                                    | F: GACAATCCAATCTCACTTT<br>R: TGTGTCAAGCATACCTTC   | 47.3<br>49.4 | 124                         |
| 23      | mPgCIR26 | (GT) <sub>2</sub> (GA) <sub>17</sub>                  | F: CTACCAAGGAGATAGCAAG<br>R: GAAATGGAGACTTTGGAG   | 49.3<br>47.5 | 185                         |
| 24      | mPgCIR30 | (GA) <sub>30</sub>                                    | F: CTCAAAGCACTATCATGTGC<br>R: CCTTGTGGGTTCTCTTTTG | 51.0<br>51.1 | 176                         |

| Sr. No. | Locus     | Repeat motif                               | Primer sequence (5' to 3')                          | Tm           | Reference allelic Size (bp) |
|---------|-----------|--------------------------------------------|-----------------------------------------------------|--------------|-----------------------------|
| 25      | mPgCIR31  | (GA) <sub>24</sub>                         | F: TCTCACTGATGCAACTTTTC<br>R: CCCATTTTCATCTCAAAGTC  | 50.6<br>49.0 | 128                         |
| 26      | mPgCIR32  | (GA) <sub>16</sub>                         | F: CGCCTTTCGTAAAAGAAGT<br>R: TCATATACTCGGACAAAACG   | 50.5<br>49.6 | 100                         |
| 27      | mPgCIR39  | (GA) <sub>17</sub>                         | F: GCTCACCTTACTCATTTCAGC<br>R: CTGTTGCTAAGAGCTTTCGT | 53.3<br>52.8 | 155                         |
| 28      | mPgCIR40  | (GTA) <sub>6</sub>                         | F: TGAATCTCCAGTGTCTTATCG<br>R: TGATTCAACTGCGTATGTC  | 51.6<br>50.6 | 141                         |
| 29      | mPgCIR41  | (GA) <sub>13</sub>                         | F: AAGTGGTGTGACGAACTACC<br>R: CTTAGTTTGACCGCTCCAGT  | 54.9<br>54.6 | 136                         |
| 30      | mPgCIR42  | (GA) <sub>9</sub>                          | F: CTCACCCAAAATCTACACAAG<br>R: AAGGGACTGGACGATGTT   | 51.2<br>53.4 | 107                         |
| 31      | mPgCIR46  | (GA) <sub>36</sub>                         | F: ATAGAACGCCATGTTACCAA<br>R: CAGGCTTATCTGTTACACCA  | 51.6<br>51.9 | 159                         |
| 32      | mPgCIR89  | (GA) <sub>16</sub>                         | F: TCGTCCAGAATCTTAAAAGC<br>R: AACTAGCATGTGACCAGGAG  | 50.1<br>54.2 | 274                         |
| 33      | mPgCIR91  | (GA) <sub>16</sub> / (GGGA) <sub>3</sub>   | F: GCGGTGGATTGGAATTTAG<br>R: CCAAGTAACCCACAACAATA   | 49.2<br>50.1 | 125                         |
| 34      | mPgCIR93  | (GA) <sub>16</sub>                         | F: GCATCATGTGTTTGAACGAT<br>R: AAGTGTGCGTTCTCCATCT   | 51.5<br>54.0 | 123                         |
| 35      | mPgCIR94  | (GA) <sub>18</sub> /(GT) <sub>6</sub>      | F: CAACCTTCCCGTGATTATT<br>R: CTAGCTTCTTCAGTGGGAAC   | 49.8<br>52.7 | 254                         |
| 36      | mPgCIR98  | (GA) <sub>15</sub>                         | F: CATCAACTTTCCAGGCATA<br>R: CCATTCAGTCGGTTTGAC     | 49.9<br>50.9 | 127                         |
| 37      | mPgCIR99  | (GA) <sub>20</sub> (GT) <sub>14</sub>      | F: TCAAAGTCCAAAACATCATGC<br>R: GGGATGGAGTAAAGATGAAA | 51.1<br>49.4 | 220                         |
| 38      | mPgCIR105 | (GA) <sub>30</sub> / (GAAAGA) <sub>3</sub> | F: CCTCCTTCGCTCTACATAAA<br>R: ATTACCCACGAACATATCA   | 51.4<br>50.9 | 235                         |
| 39      | mPgCIR110 | (GT) <sub>33</sub>                         | F: GCCCCATTCTAAGAGACAAT<br>R: GAATGAAACCAGGTGTAGCA  | 52.0<br>52.7 | 118                         |
| 40      | mPgCIR111 | (GA) <sub>19</sub>                         | F: CAACCTCGTTTGAGTCTTCT<br>R: AACATCATTGGGACCATTC   | 52.2<br>50.4 | 115                         |
| 41      | mPgCIR137 | (GA) <sub>18</sub>                         | F: GGGGAATGCAGAGATTGT<br>R: AGATGATGGTCTCGCTTTT     | 52.2<br>51.4 | 100                         |
| 42      | mPgCIR139 | (GT) <sub>9</sub> / (GA) <sub>9</sub>      | F: ATAATCCCCCTCCATAACTA<br>R: CCAACTCAACATGAGAAGC   | 49.3<br>51.2 | 207                         |
| 43      | mPgCIR140 | -                                          | F: GTGGTGAAGGAGTAAAGCTG<br>R: GCAGTATAAAGCAACAGATGG | 53.2<br>51.6 | -                           |
| 44      | mPgCIR146 | (GT) <sub>11</sub>                         | F: CGGATATTAGCAGGAGAAAA<br>R: AATGTTTGACGACTCGAAAG  | 49.4<br>50.8 | 110                         |
| 45      | mPgCIR150 | (GA) <sub>15</sub>                         | F: CCTAGTGACTCGAAGCAATC<br>R: TTGAGCCCTAGCATAGACAG  | 52.7<br>53.8 | 108                         |
| 46      | mPgCIR153 | (GA) <sub>20</sub>                         | F: GCCTCTGGTAAATCTGTTGA<br>R: ACATACGGATCAAGTCCAAA  | 52.2<br>51.3 | 115                         |
| 47      | mPgCIR157 | (GA) <sub>21</sub> / (GGAA) <sub>3</sub>   | F: AACCACCAAACCATACACC<br>R: CGACCAACCCTACATTCTG    | 52.8<br>52.8 | 209                         |
| 48      | mPgCIR160 | -                                          | F: TGGCTATAAGAATGGGAGAT<br>R: GACGAGCTTAGCCTCTGAAT  | 50.2<br>52.4 | -                           |
| 49      | mPgCIR161 | -                                          | F: TCTCAAGGACCAACAAGAAG<br>R: AGGACTTAGCTTGGGTTTTTC | 52.0<br>52.4 | -                           |

| Sr. No. | Locus     | Repeat motif                                                                       | Primer sequence (5' to 3')                          | Tm           | Reference allelic Size (bp) |
|---------|-----------|------------------------------------------------------------------------------------|-----------------------------------------------------|--------------|-----------------------------|
| 50      | mPgCIR165 | (GA) <sub>11</sub>                                                                 | F: TAAGGGATTTCATTTCCGAGT<br>R: CTGGTGTGACGATGACTTTT | 50.8<br>52.8 | 124                         |
| 51      | mPgCIR175 | (GA) <sub>16</sub>                                                                 | F: GCATTATGTGCCAAGCAA<br>R: TGCCAAGGTGTAATGTTGTA    | 51.3<br>51.8 | 104                         |
| 52      | mPgCIR176 | (GA) <sub>15</sub> / (GA) <sub>10</sub> / (GT) <sub>18</sub> / (CGTC) <sub>3</sub> | F: TTCTCAATGATAGGTTACGG<br>R: ATGACTATTCTCCACCAGAT  | 49.1<br>50.1 | 151                         |
| 53      | mPgCIR179 | (GA) <sub>16</sub>                                                                 | F: GGGTCTCGACTAAAGAAGGA<br>R: CCTCCATTTGCATCAACTTT  | 53.3<br>51.3 | 147                         |
| 54      | mPgCIR183 | (GA) <sub>27</sub>                                                                 | F: GAAGAACAGAGACGCACCT<br>R: GCGCTAGGCTATAAATCATC   | 54.5<br>50.7 | 183                         |
| 55      | mPgCIR186 | (GA) <sub>18</sub> / (GA) <sub>8</sub> / (GA) <sub>15</sub>                        | F: TCGAGCGGTTCTTGTCTCT<br>R: ATCTTCTCCTCCTTCCATCC   | 56.1<br>53.3 | 224                         |
| 56      | mPgCIR188 | (GA) <sub>9</sub>                                                                  | F: TGGATGAATCAGGAGGATTA<br>R: TTGTGGGGAAGAACTACTG   | 50.1<br>52.1 | 189                         |
| 57      | mPgCIR194 | (GA) <sub>20</sub>                                                                 | F: GCAGAGAATCGAAGCACTA<br>R: GCAAGCACAGGTTCTACTTT   | 51.9<br>53.1 | 172                         |
| 58      | mPgCIR196 | (GA) <sub>17</sub>                                                                 | F: TAACACCACGTCCATCAATA<br>R: GCGTTAAGCTACTTTGGCTA  | 51.0<br>52.7 | 120                         |
| 59      | mPgCIR198 | (GA) <sub>22</sub> / (GGTTGA) <sub>3</sub>                                         | F: CTCGATCAGAAGAACAACATC<br>R: ACTGTTCTGATGGCTCTC   | 50.9<br>54.1 | 176                         |
| 60      | mPgCIR201 | (GA) <sub>19</sub>                                                                 | F: TTGCTTCGAGCTTCTACT<br>R: ACAATTTTCGTGGGCTCGT     | 53.8<br>54.8 | 133                         |
| 61      | mPgCIR208 | (GA) <sub>29</sub> / (GAG) <sub>5</sub>                                            | F: AGCACGATGTAGGAAGAGAC<br>R: CGGCAAGCTCAACAATATAA  | 53.9<br>50.7 | 242                         |
| 62      | mPgCIR209 | -                                                                                  | F: CTAAAGCCACATCCAGCA<br>R: CTAACATTTGCCTTCTACAGC   | 52.4<br>51.5 | -                           |
| 63      | mPgCIR216 | -                                                                                  | F: GATGGAAGTCAATGTATGA<br>R: AGACCTGCTCTGACTTGTGA   | 50.7<br>55.6 | -                           |
| 64      | mPgCIR227 | (GA) <sub>16</sub>                                                                 | F: GGGATGCTCAAACTGTAAG<br>R: CCTGTTACATTGACGAATCA   | 51.2<br>50.1 | 168                         |
| 65      | mPgCIR228 | (GT) <sub>14</sub> / (GA) <sub>18</sub>                                            | F: CAGAACAAAGAAGAGGATCTG<br>R: TGGATCAGTAGAATCGTTTG | 50.7<br>49.6 | 153                         |
| 66      | mPgCIR229 | (GA) <sub>26</sub>                                                                 | F: GTCAAGCATACCTTCACCTC<br>R: CATCTCATCAACAGATTGGA  | 53.0<br>49.6 | 143                         |
| 67      | mPgCIR233 | -                                                                                  | F: GACTGAAGACCCAAATACCA<br>R: TTAGGCTGAAATGCTCCTTA  | 51.9<br>51.1 | -                           |
| 68      | mPgCIR234 | (GT) <sub>11</sub>                                                                 | F: TTGGCTTGTAACACTACTGG<br>R: GCATCTCTTCATTGGTGAT   | 52.4<br>50.5 | 159                         |
| 69      | mPgCIR235 | (GA) <sub>28</sub> / (GAGT) <sub>4</sub>                                           | F: TCTTCTGGACAACAAATTCC<br>R: GATTTAAGGCAAAGGATCG   | 50.3<br>48.7 | 204                         |
| 70      | mPgCIR236 | (GA) <sub>23</sub>                                                                 | F: ACTCATATTCCGTTTGCATC<br>R: GAATTAACGACGAGTTCCAC  | 50.5<br>51.1 | 164                         |
| 71      | mPgCIR237 | (GA) <sub>16</sub>                                                                 | F: AGATTCCATCTGCGATTGT<br>R: GCGGATCAAAACCTAATCT    | 51.4<br>49.9 | 101                         |
| 72      | mPgCIR242 | (GA) <sub>12</sub>                                                                 | F: TTAAGGTGGGACCAAGAAG<br>R: GACGTATCGGATCAAGTTTC   | 51.6<br>50.7 | 178                         |
| 73      | mPgCIR243 | (GA) <sub>29</sub>                                                                 | F: ACAGCAGGACACAAAGGA<br>R: GCTCTGAGGTGGTTTTTCAT    | 53.9<br>52.5 | 174                         |
| 74      | mPgCIR246 | (GA) <sub>21</sub>                                                                 | F: GAATTACAAATGCCTTGTC<br>R: GCTCTAAAGTGCAACCAAAG   | 49.5<br>51.9 | 132                         |

| Sr. No. | Locus     | Repeat motif                           | Primer sequence (5' to 3')                            | Tm           | Reference allelic Size (bp) |
|---------|-----------|----------------------------------------|-------------------------------------------------------|--------------|-----------------------------|
| 75      | mPgCIR247 | (GA) <sub>20</sub>                     | F: CTTTGCCTCAATGTGTTTG<br>R: CCTTGTCACTCTTATAGCATCA   | 50.4<br>51.9 | 191                         |
| 76      | mPgCIR249 | (GA) <sub>21</sub> /(GAA) <sub>5</sub> | F: TTTGTCTGGTCGTCCTAGTT<br>R: CTCAGTCCATCAGCAAAAT     | 53.2<br>50.7 | 259                         |
| 77      | mPgCIR251 | (GA) <sub>21</sub>                     | F: TTTACAGCTTCTTCCTTTGC<br>R: GTCGTCTACTTCGATGGTTC    | 50.9<br>52.6 | 196                         |
| 78      | mPgCIR252 | -                                      | F: AGGAAGAAAGGGTGGTCTAT<br>R: CTCCTGTTCTCGTTCCTTAGG   | 52.7<br>52.1 | -                           |
| 79      | mPgCIR253 | (GA) <sub>29</sub>                     | F: TGCCCTTAGCCTATAACTCA<br>R: CTTGTGGTCCAAGATGCTAT    | 52.7<br>52.2 | 197                         |
| 80      | mPgCIR255 | (GA) <sub>27</sub> /(GA) <sub>23</sub> | F: TTGTTCTCTTTGTGGTTCT<br>R: GTGACAACGTCAGTGGAGA      | 51.7<br>54.4 | 210                         |
| 81      | mPgCIR256 | (GA) <sub>12</sub>                     | F: AGGTGCATGATTACGATTCT<br>R: CGAGGTTCTTGATGTTGTCT    | 51.4<br>52.3 | 212                         |
| 82      | mPgCIR257 | (GA) <sub>29</sub>                     | F: CGACTCATTTTCTGGTCTGT<br>R: CAACCACCTTCATCAATTTC    | 52.3<br>49.5 | 203                         |
| 83      | mPgCIR265 | (TC) <sub>24</sub>                     | F: CTACAGCGAATTTCTCGATT<br>R: GTCAACGGATCAATGTGG      | 50.2<br>51.0 | 144                         |
| 84      | mPgCIR284 | (AC) <sub>10</sub>                     | F: AACCTTTCGGGGTCAAG<br>R: GATCCGATTGCGGAAGAG         | 54.9<br>53.1 | 90                          |
| 85      | mPgCIR285 | -                                      | F: CTTTGGGTGTCTCTGTGTCT<br>R: CAGCCAGGGCATAAGTATAG    | 54.3<br>52.4 | -                           |
| 86      | mPgCIR287 | (AG) <sub>35</sub> /(TA) <sub>6</sub>  | F: GCTGGTGCAAAAAGTAGTCA<br>R: GCAGTTCTTTTCTTCTAACC    | 53.0<br>51.4 | 266                         |
| 87      | mPgCIR290 | (GA) <sub>23</sub>                     | F: AAATAGGAAGTAACCTGTGC<br>R: CCTGAACCTTCTGTGTTTATATT | 49.9<br>48.2 | 185                         |
| 88      | mPgCIR298 | -                                      | F: GCGTATGTCAATCCATGTG<br>R: CAGGAATATGATGCTGGAAG     | 51.3<br>50.6 | -                           |
| 89      | mPgCIR321 | (CT) <sub>19</sub>                     | F: TTTTGGCCTGGGAATATAG<br>R: TAAAACGAAAGCAGAAAACC     | 49.4<br>49.1 | 129                         |
| 90      | mPgCIR334 | (AG) <sub>26</sub>                     | F: GGATCTAACCACCTTTCTT<br>R: AAACAGGACTGAGTTTCGAG     | 51.6<br>52.2 | 190                         |
| 91      | mPgCIR343 | (AG) <sub>20</sub>                     | F: CACTCACAGCATCGTAAA<br>R: GAAGTGGCAAGAATATCTGT      | 49.6<br>49.9 | 250                         |
| 92      | mPgCIR347 | -                                      | F: CTCTGAAAGGGAGAGGACTT<br>R: AGAATCTTCGCCTATTGCTT    | 53.4<br>51.7 | -                           |
| 93      | mPgCIR352 | (GA) <sub>25</sub>                     | F: TCGTAGTTAAACGAGTGATGC<br>R: GGACCAAACAGATATTCCAA   | 52.5<br>49.9 | 181                         |
| 94      | mPgCIR361 | -                                      | F: CTCATGTCCCTTATCAATGT<br>R: AATGTCTCGGTCAATTAGGA    | 51.9<br>50.8 | -                           |
| 95      | mPgCIR377 | -                                      | F: CCAAACAAGGATTCACAAAT<br>R: TGTGGTTTAGTTCTTAGTTTGC  | 48.9<br>51.6 | -                           |
| 96      | mPgCIR378 | (CT) <sub>10</sub> /(CT) <sub>6</sub>  | F: GTCATTGCCTGTTGATTTT<br>R: GCTTTCTCATTTCTTAACCAAG   | 49.9<br>51.4 | 162                         |
| 97      | mPgCIR392 | (AG) <sub>10</sub>                     | F: AACTGTTTCTCTGGTTTGATG<br>R: ACGAAACGTCCTTGTCTTA    | 51.6<br>50.9 | 107                         |
| 98      | mPgCIR404 | (GA) <sub>32</sub>                     | F: CTGCAACACATTGAACATTT<br>R: ATTCAGGCTTCTGGTTTGT     | 49.7<br>51.9 | 210                         |
| 99      | mPgCIR405 | -                                      | F: GAGATTTGGTTGAGGAAGGT<br>R: TTTCAAAATCAAGAGCCAAC    | 52.2<br>49.1 | -                           |

| Sr. No. | Locus     | Repeat motif                           | Primer sequence (5' to 3')                          | Tm           | Reference allelic Size (bp) |
|---------|-----------|----------------------------------------|-----------------------------------------------------|--------------|-----------------------------|
| 100     | mPgCIR414 | (AG) <sub>6</sub> /(GA) <sub>17</sub>  | F: AACAAACACGCTTTGAAGTTT<br>R: CCCAGAAAGATGAGACAAAG | 51.2<br>50.7 | 230                         |
| 101     | mPgCIR418 | (TC) <sub>24</sub> /(TCT) <sub>6</sub> | F: ACGTGACCTTCTCCAACAT<br>R: ACTGGATCGACTGAAGATGA   | 53.7<br>52.8 | 228                         |
| 102     | mPgCIR422 | (GA) <sub>10</sub>                     | F: CCGAAAAACACAAGGGTTC<br>R: AGGTTCAAATGGTTTGTGG    | 51.4<br>50.9 | 236                         |
| 103     | mPgCIR437 | (AG) <sub>10</sub>                     | F: ACAACAGTTCTGATCCCAAA<br>R: CTCGGAGACACAGAGGTCTA  | 51.8<br>55.1 | 153                         |
| 104     | mPgCIR441 | (AC) <sub>10</sub>                     | F: TAGGTATGGTTTGAAAGCTC<br>R: GTCTTTCTGCAAATATCCAT  | 49.6<br>47.9 | 179                         |
| 105     | mPgCIR446 | -                                      | F: GTGACCACTTTCTCAAAGCTA<br>R: ATCTCCATTCTTGCTCGT   | 52.5<br>51.4 | -                           |
| 106     | mPgCIR448 | (GT) <sub>6</sub>                      | F: GGAGAGTAGGGTTTCAAAGG<br>R: CGTTTGTTGGACTTGGAG    | 52.4<br>51.1 | 114                         |

For the present study, 106 SSR primer pairs (Table 1) belonging to same series were selected from Genome Database for guava (<http://neiker.net/neiker/guavamap>) and the published literature. The SSR primers were synthesized through Integrated DNA technologies (IDT). The 106 SSR primers were used for generating a linkage map.

**Table S4.** Anthocyanin Reflective Index (ARI) values of F1 hybrids ('AS' x 'PG').

| F1 Hybrids 'AS' x 'PG' | Anthocyanin Reflective Index (ARI) |
|------------------------|------------------------------------|
| 1                      | 0.238                              |
| 2                      | 0.191                              |
| 3                      | 0.225                              |
| 4                      | 0.267                              |
| 5                      | 0.273                              |
| 6                      | 0.284                              |
| 7                      | 0.175                              |
| 8                      | 0.226                              |
| 9                      | 0.177                              |
| 10                     | 0.177                              |
| 11                     | 0.238                              |
| 12                     | 0.228                              |
| 13                     | 0.191                              |
| 14                     | 0.224                              |
| 15                     | 0.185                              |
| 16                     | 0.165                              |
| 17                     | 0.227                              |
| 18                     | 0.239                              |
| 19                     | 0.231                              |
| 20                     | 0.190                              |
| 21                     | 0.165                              |
| 22                     | 0.212                              |
| 23                     | 0.215                              |
| 24                     | 0.191                              |
| 25                     | 0.185                              |
| 26                     | 0.169                              |
| 27                     | 0.192                              |
| 28                     | 0.184                              |
| 29                     | 0.255                              |

|    |       |
|----|-------|
| 30 | 0.192 |
| 31 | 0.191 |
| 32 | 0.187 |
| 33 | 0.245 |
| 34 | 0.196 |
| 35 | 0.238 |
| 36 | 0.195 |
| 37 | 0.272 |
| 38 | 0.251 |
| 39 | 0.218 |
| 40 | 0.184 |
| 41 | 0.228 |
| 42 | 0.161 |
| 43 | 0.215 |
| 44 | 0.251 |
| 45 | 0.226 |
| 46 | 0.161 |
| 47 | 0.187 |
| 48 | 0.239 |
| 49 | 0.247 |
| 50 | 0.248 |
| 51 | 0.227 |
| 52 | 0.267 |
| 53 | 0.227 |
| 54 | 0.229 |
| 55 | 0.185 |
| 56 | 0.232 |
| 57 | 0.244 |
| 58 | 0.210 |
| 59 | 0.179 |
| 60 | 0.200 |
| 61 | 0.165 |
| 62 | 0.228 |
| 63 | 0.211 |
| 64 | 0.240 |
| 65 | 0.213 |
| 66 | 0.247 |
| 67 | 0.224 |
| 68 | 0.272 |
| 69 | 0.218 |
| 70 | 0.201 |
| 71 | 0.247 |
| 72 | 0.234 |
| 73 | 0.247 |
| 74 | 0.225 |
| 75 | 0.197 |
| 76 | 0.187 |
| 77 | 0.247 |
| 78 | 0.189 |
| 79 | 0.241 |
| 80 | 0.228 |

|     |       |
|-----|-------|
| 81  | 0.238 |
| 82  | 0.244 |
| 83  | 0.212 |
| 84  | 0.213 |
| 85  | 0.242 |
| 86  | 0.241 |
| 87  | 0.226 |
| 88  | 0.211 |
| 89  | 0.194 |
| 90  | 0.211 |
| 91  | 0.211 |
| 92  | 0.190 |
| 93  | 0.211 |
| 94  | 0.218 |
| 95  | 0.214 |
| 96  | 0.211 |
| 97  | 0.211 |
| 98  | 0.214 |
| 99  | 0.203 |
| 100 | 0.218 |
| 101 | 0.210 |
| 102 | 0.211 |
| 103 | 0.228 |
| 104 | 0.218 |
| 105 | 0.196 |
| 106 | 0.218 |
| 107 | 0.205 |
| 108 | 0.204 |
| 109 | 0.239 |
| 110 | 0.271 |
| 111 | 0.205 |
| 112 | 0.237 |
| 113 | 0.232 |
| 114 | 0.261 |
| 115 | 0.232 |
| 116 | 0.175 |
| 117 | 0.252 |
| 118 | 0.257 |
| 119 | 0.230 |
| 120 | 0.256 |
| 121 | 0.254 |
| 122 | 0.206 |
| 123 | 0.210 |
| 124 | 0.233 |
| 125 | 0.205 |
| 126 | 0.193 |
| 127 | 0.176 |
| 128 | 0.211 |
| 129 | 0.176 |
| 130 | 0.212 |
| 131 | 0.205 |



|     |       |
|-----|-------|
| 132 | 0.205 |
| 133 | 0.173 |
| 134 | 0.212 |
| 135 | 0.176 |
| 136 | 0.211 |
| 137 | 0.170 |
| 138 | 0.211 |
| 139 | 0.177 |
| 140 | 0.210 |
| 141 | 0.190 |
| 142 | 0.209 |
| 143 | 0.174 |
| 144 | 0.218 |
| 145 | 0.205 |
| 146 | 0.189 |
| 147 | 0.191 |
| 148 | 0.185 |
| 149 | 0.251 |
| 150 | 0.244 |
| 151 | 0.192 |
| 152 | 0.187 |
| 153 | 0.272 |
| 154 | 0.198 |
| 155 | 0.231 |
| 156 | 0.253 |
| 157 | 0.214 |
| 158 | 0.215 |
| 159 | 0.187 |
| 160 | 0.205 |
| 161 | 0.222 |
| 162 | 0.275 |
| 163 | 0.205 |
| 164 | 0.252 |
| 165 | 0.174 |
| 166 | 0.198 |
| 167 | 0.218 |
| 168 | 0.218 |
| 169 | 0.213 |
| 170 | 0.212 |
| 171 | 0.170 |
| 172 | 0.204 |
| 173 | 0.204 |
| 174 | 0.218 |
| 175 | 0.212 |
| 176 | 0.252 |
| 177 | 0.175 |
| 178 | 0.205 |
| 179 | 0.213 |
| 180 | 0.219 |
| 181 | 0.211 |
| 182 | 0.257 |

|     |       |
|-----|-------|
| 183 | 0.205 |
| 184 | 0.214 |
| 185 | 0.232 |
| 186 | 0.210 |
| 187 | 0.218 |
| 188 | 0.210 |
| 189 | 0.178 |
| 190 | 0.211 |
| 191 | 0.218 |
| 192 | 0.212 |
| 193 | 0.213 |
| 194 | 0.204 |
| 195 | 0.204 |
| 196 | 0.170 |
| 197 | 0.219 |
| 198 | 0.247 |
| 199 | 0.238 |
| 200 | 0.205 |
| 201 | 0.211 |
| 202 | 0.210 |
| 203 | 0.232 |
| 204 | 0.216 |
| 205 | 0.204 |
| 206 | 0.239 |
| 207 | 0.238 |
| 208 | 0.172 |
| 209 | 0.173 |
| 210 | 0.218 |
| 211 | 0.210 |
| 212 | 0.257 |
| 213 | 0.211 |
| 214 | 0.205 |
| 215 | 0.205 |
| 216 | 0.241 |
| 217 | 0.214 |
| 218 | 0.240 |
| 219 | 0.218 |
| 220 | 0.205 |
| 221 | 0.228 |
| 222 | 0.210 |
| 223 | 0.239 |
| 224 | 0.198 |
| 225 | 0.196 |
| 226 | 0.210 |
| 227 | 0.236 |
| 228 | 0.218 |
| 229 | 0.196 |
| 230 | 0.176 |
| 231 | 0.212 |
| 232 | 0.219 |
| 233 | 0.172 |

|                           |                     |
|---------------------------|---------------------|
| 234                       | 0.205               |
| 235                       | 0.211               |
| 236                       | 0.176               |
| 237                       | 0.205               |
| 238                       | 0.214               |
| <b>Mean</b>               | <b>0.214</b>        |
| <b>Standard Deviation</b> | <b>0.025562314</b>  |
| <b>Skewness</b>           | <b>0.203954091</b>  |
| <b>Kurtosis</b>           | <b>-0.280135581</b> |

**Table S5.** Composition of CTAB Extraction Buffer.

| Components                 | Working Concentration |
|----------------------------|-----------------------|
| CTAB                       | 1.5%                  |
| Tris HCl (pH 8.0)          | 100 mM                |
| NaCl                       | 1.4 M                 |
| EDTA (pH 8.0)              | 20 mM                 |
| β-Mercaptoethanol          | 2%                    |
| Polyvinylpyrrolidone (PVP) | 2%                    |

The final pH of the buffer was adjusted to 8.0.

**Table S6.** Temperature profile used in PCR.

| Step                 | Temperature (°C) | Time (minutes) | No. of cycles |
|----------------------|------------------|----------------|---------------|
| Initial denaturation | 94               | 4              | 1             |
| Denaturation         | 94               | 1              | 35            |
| Annealing            | 50-60            | 1              |               |
| Elongation           | 72               | 1              |               |
| Final Extension      | 72               | 7              | 1             |
| Pause                | 4                | -              | -             |

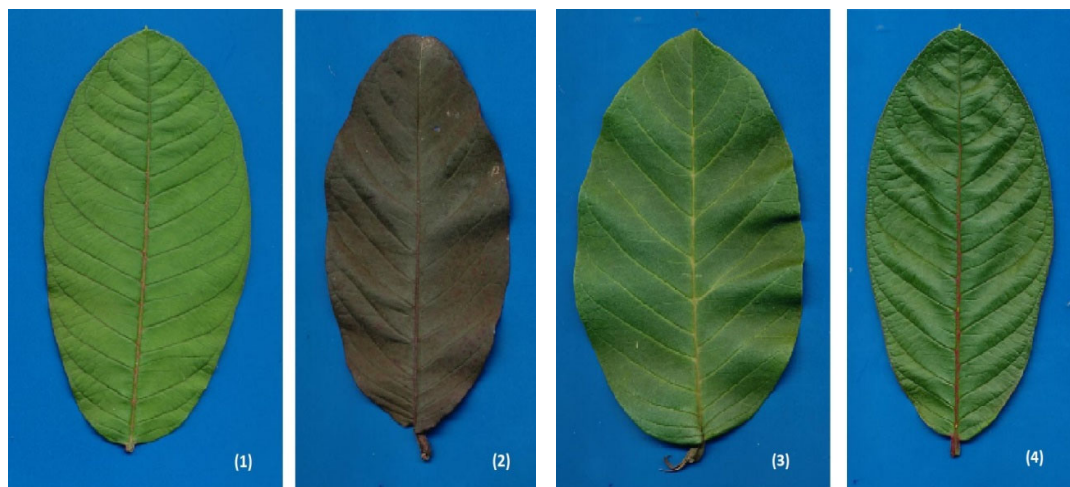

**Figure S1.** Variation in leaf colour of different guava parents used for obtaining F1 population viz. (1) 'AS' (2) 'PG' (3) 'SL' (4) 'CISH G-1'.

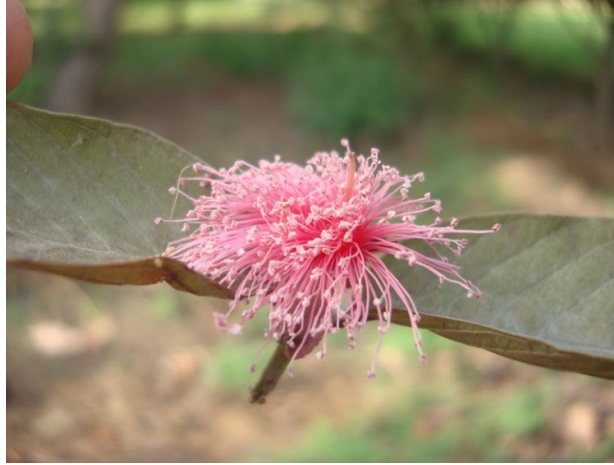

**Figure S2.** Selection of pollen flower ((Purple guava (local) 'PG') for the pollination.

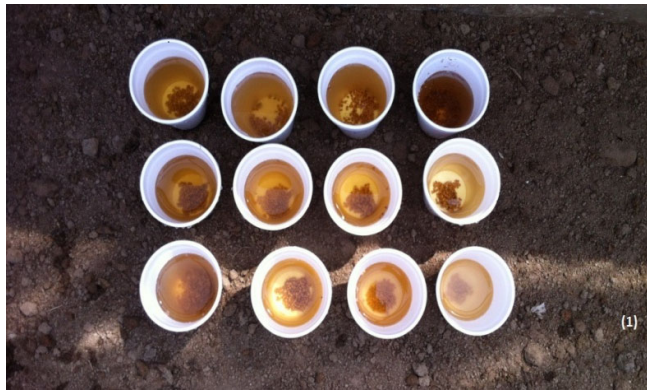

**Figure S3.** Extraction and Soaking of F1 hybrids (H) seeds obtained from cross combination (I) 'AS' x 'PG'.

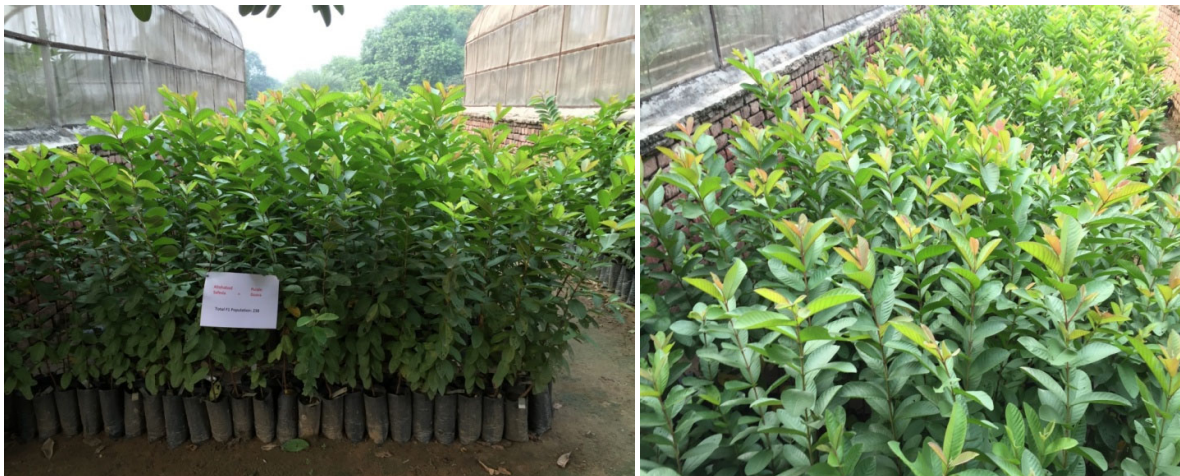

**Figure S4.** Seggregating 238 hybrids F1 hybrids (H) used as mapping population maintained in old orchard of Punjab Agricultural University, 141004, India.

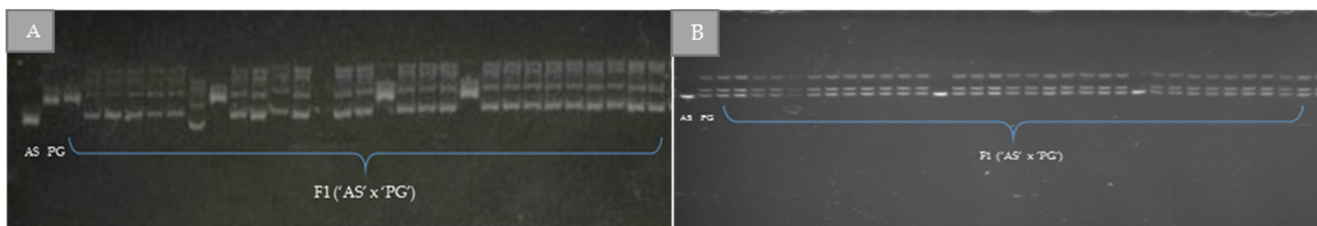

**Figure S5.** PCR amplification profile of (A) mPgCIR208 and (B) MdMYB10F1 on two parents [AS= Allahabad Safeda, PG= Purple guava (Local)] and their segregating F1 progenies.
